# Supplementary material
Source: PubMed Central journal article supplement (PMC8522732)
Supplement: aac.01137-21-s0001.pdf [file aac.01137-21-s0001.pdf]

1 **Supplemental figure legends**

2

3 **Supplemental Fig. S1. Plasma concentrations of BXA in ferrets after subcutaneous**

4 **injection of 8 mg/kg BXA.** BXA was suspended in 0.5% methylcellulose (5.32 mg/mL)

5 and injected subcutaneously into four sites on the dorsal side of the ferret (0.5 mL/site).

6 Blood samples were collected at various time points, and the plasma concentration of

7 BXA was determined using a qualified LC-MS/MS assay. The EC<sub>50</sub>s of the IBVs were

8 plotted based on calculated values derived from plaque reduction assays in MDCK cells

9 (1). Dotted line indicates the estimated target of effectiveness (6.85 ng/mL) (2).

10

11 **Supplemental Fig. S2. Comparison of AUCs for virus shedding in the vehicle-**

12 **treated and BXA-treated groups of ferrets inoculated with a single virus or with a**

13 **competitive-mixture of viruses.** The AUCs for virus shedding in vehicle-treated (A)

14 and BXA-treated (B) ferrets inoculated with BR/08-I38, BR/08-I38T, or the BR/08

15 competitive-mixture were compared using two-way ANOVA with Sidak's multiple

16 comparison post-hoc test. The associated bars are color coded to indicate the groups

17 being compared. \*\* $P < 0.01$ ; \*\*\*\* $P < 0.0001$ .

18

19 **Supplemental Fig. S3. Mean proportions of BXA-Sen and BXA-Res virus**

20 **subpopulations in the URTs of ferrets inoculated with the BR/08 competitive-**

21 **mixture.** Shown are the mean proportions of the BR/08-I38 and I38T virus populations

22 in the ferrets on their first and last days of virus shedding.

23

24 **Supplemental Fig. S4. Comparison of AUCs for virus shedding in vehicle-treated**  
25 **and BXA-treated ferrets inoculated with the BR/08 or PH/13 competitive-mixture.**

26 The AUCs for virus shedding in vehicle-treated (A) and BXA-treated (B) ferrets  
27 inoculated with the BR/08 or PH/13 competitive-mixture were compared using two-way  
28 ANOVA with Sidak's multiple comparison post-hoc test. The associated bars are color  
29 coded to indicate the groups being compared. \* $P < 0.051$ ; \*\* $P < 0.01$ .

30

31 **Supplemental Fig. S5. Mean proportions of BXA-Sen and BXA-Res virus**  
32 **subpopulations in the URTs of ferrets inoculated with the PH/13 competitive-**  
33 **mixture.** Shown are the mean proportions of PH/13-I38 and I38T virus populations in  
34 the ferrets on their first and last days of virus shedding.

35

36

## References

37

- 38 1. Jones JC, Pascua PNQ, Fabrizio TP, Marathe BM, Seiler P, Barman S, Webby RJ,  
39 Webster RG, Govorkova EA. 2020. Influenza A and B viruses with reduced baloxavir  
40 susceptibility display attenuated in vitro fitness but retain ferret transmissibility. Proc Natl  
41 Acad Sci U S A 117:8593–8601. doi: 10.1073/pnas.1916825117
- 42 2. Koshimichi H, Ishibashi T, Kawaguchi N, Sato C, Kawasaki A, Wajima T. 2018.  
43 Safety, tolerability, and pharmacokinetics of the novel anti-influenza agent baloxavir  
44 marboxil in healthy adults: phase I study findings. Clin Drug Investig 38:1189–1196. doi:  
45 [10.1007/s40261-018-0710-9](https://doi.org/10.1007/s40261-018-0710-9)

Supplemental Figure S1

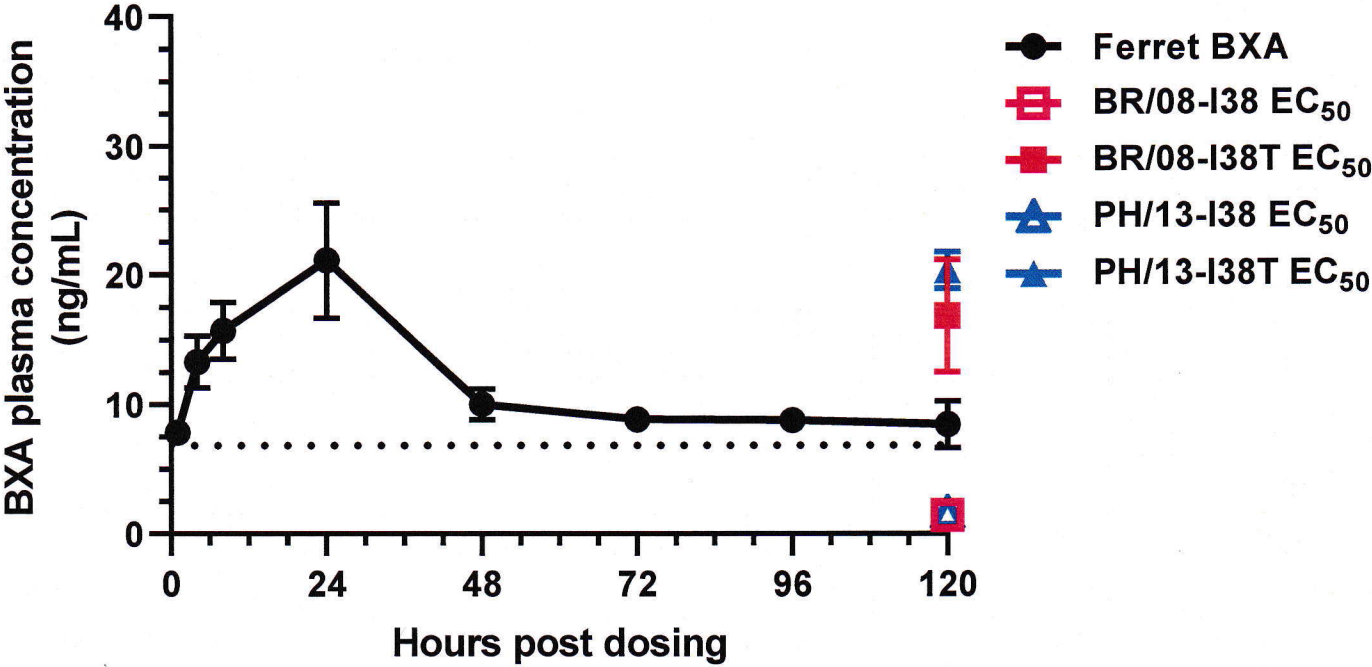

Supplemental Figure S2

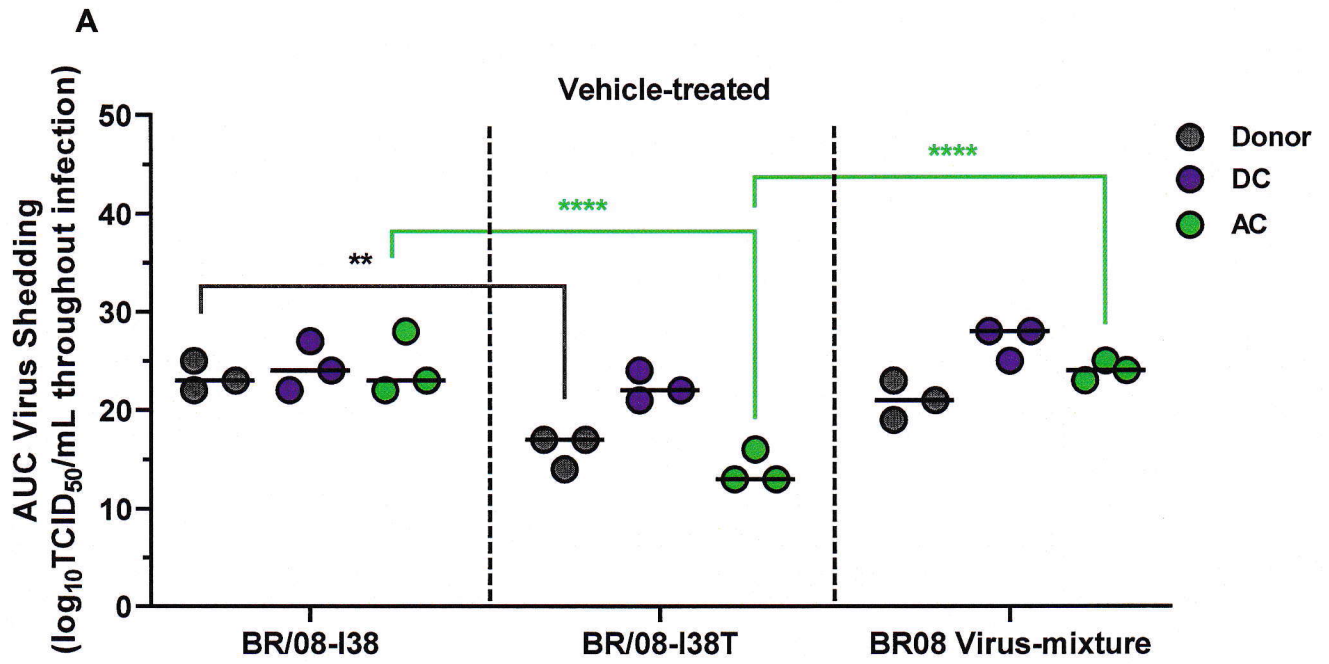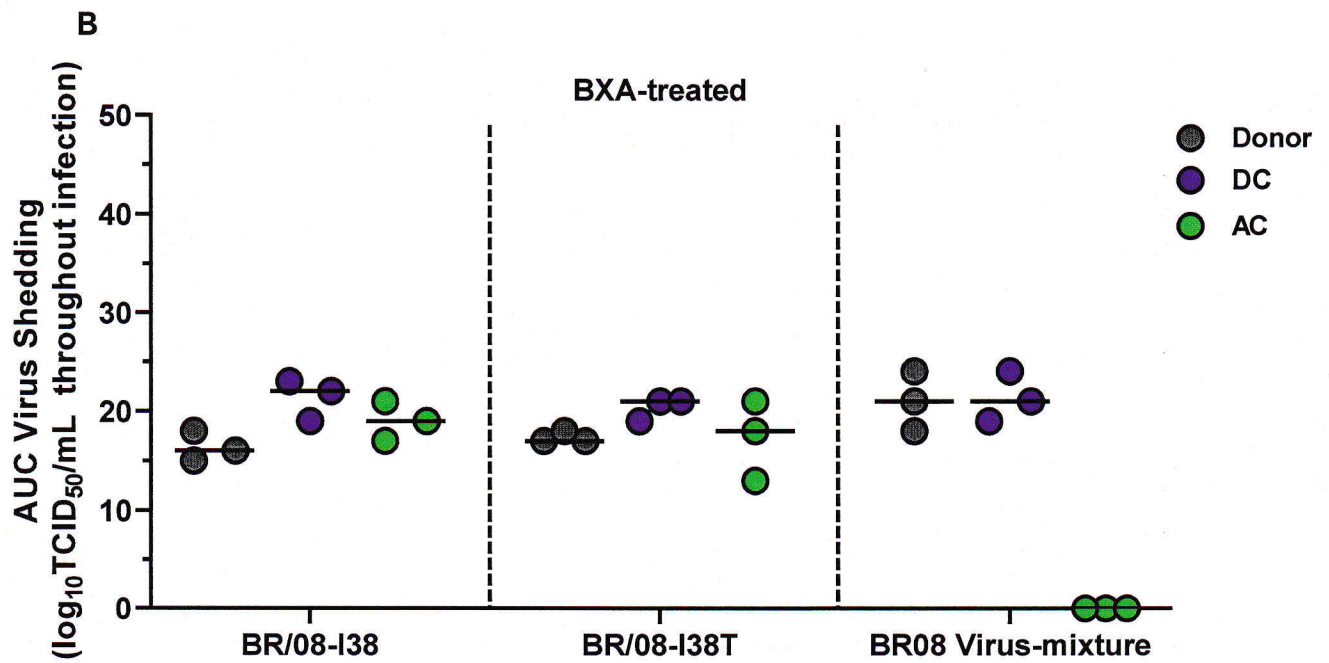



Supplemental Figure S3

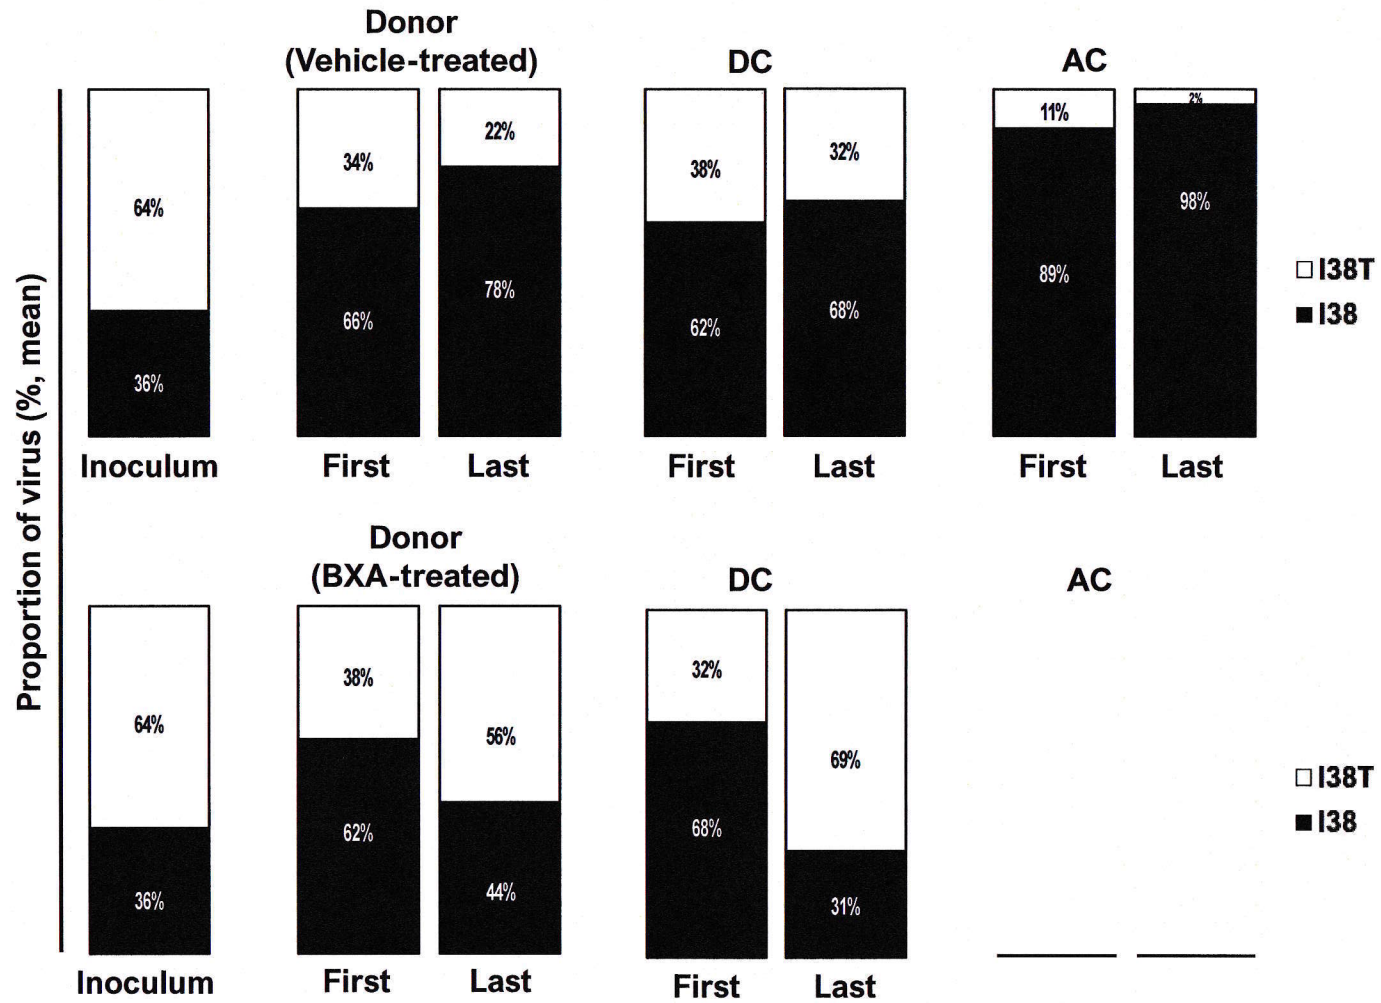

Supplemental Figure S4

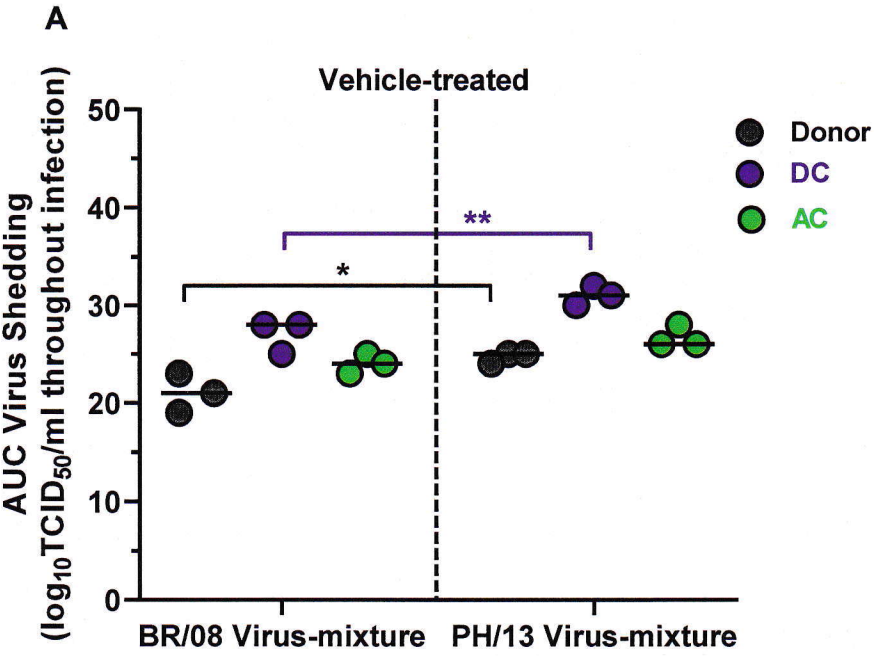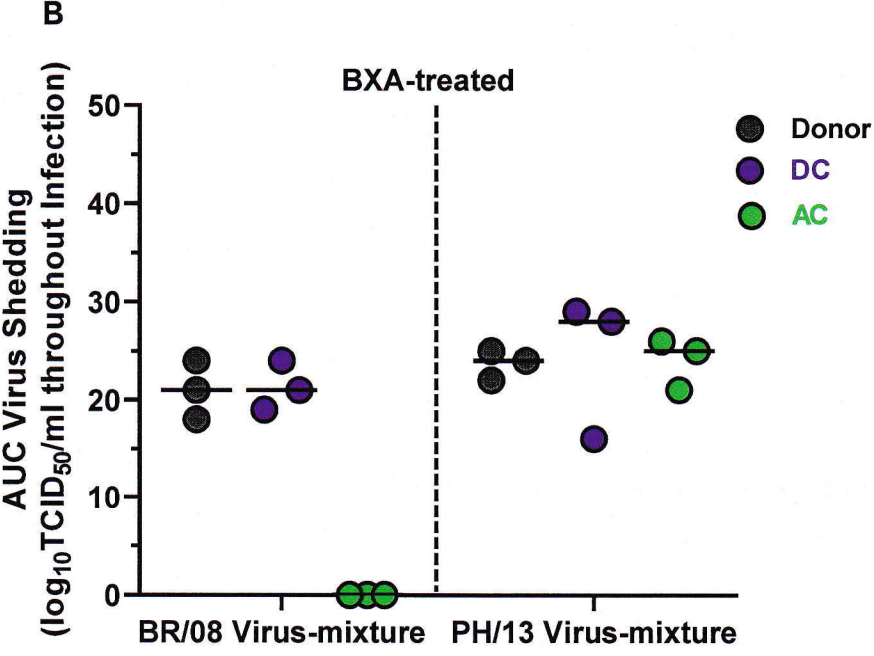

Supplemental Figure S5

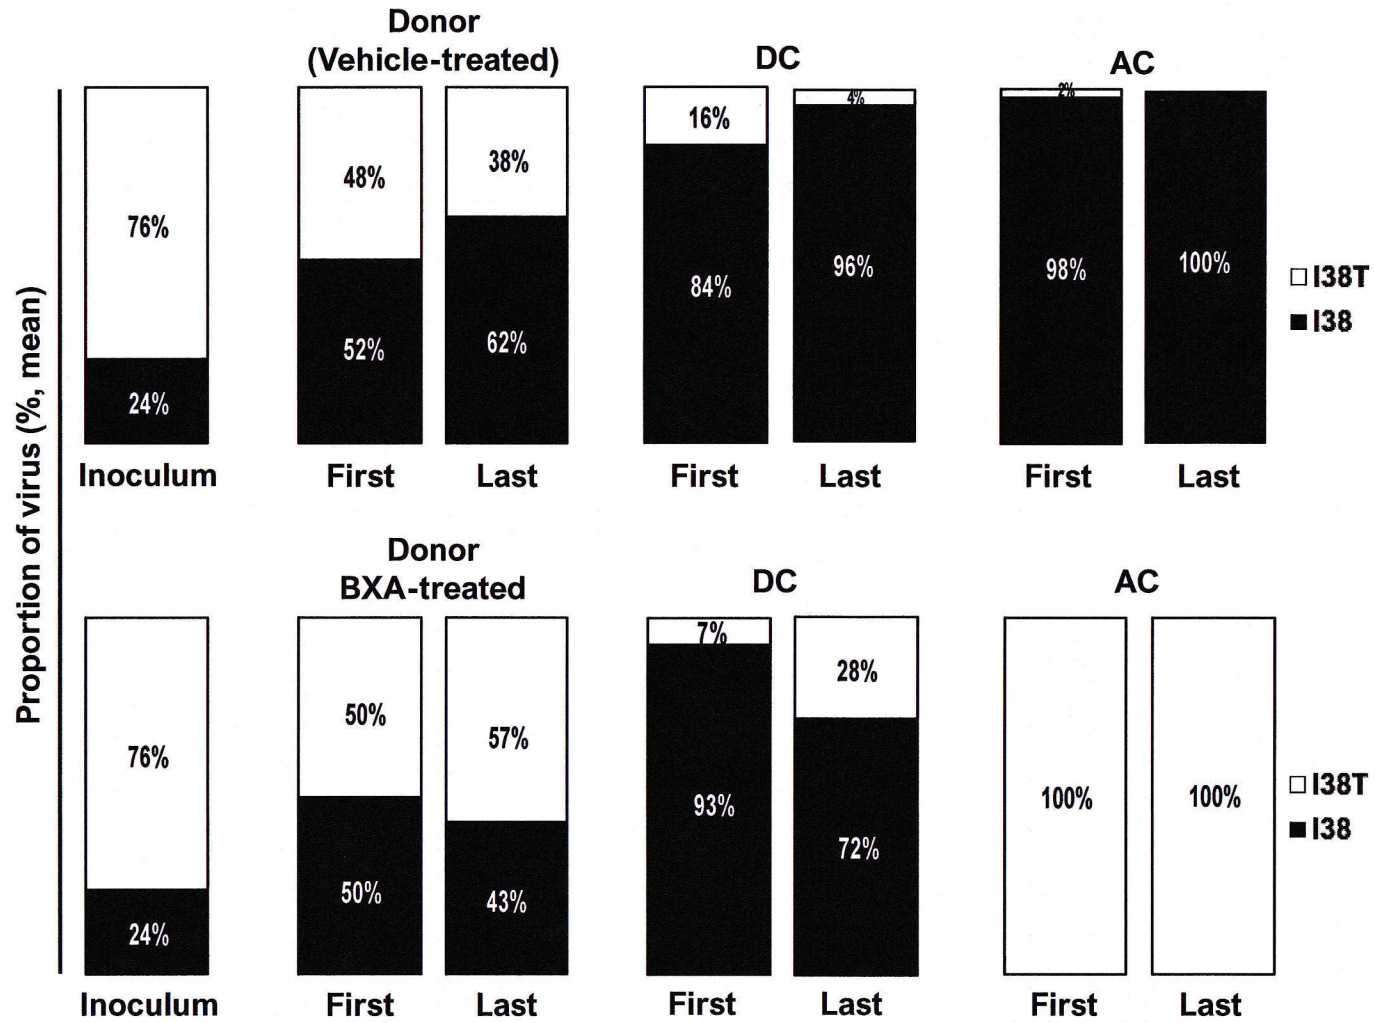



**Supplemental Table S1.** Virus pathogenicity, transmission, and seroconversion in ferrets inoculated with BXA-Sen or BXA-Res IBV.

| Experimental group          | Antiviral treatment <sup>a</sup> | Status | Maximum weight loss (%) <sup>b</sup> | Body temp. elevation (°C) <sup>c</sup> | Virus detection | Day of onset of virus shedding <sup>d</sup> | Day of highest virus shedding <sup>e</sup> | Serology <sup>f</sup> |
|-----------------------------|----------------------------------|--------|--------------------------------------|----------------------------------------|-----------------|---------------------------------------------|--------------------------------------------|-----------------------|
| <b>BR/08-I38 (BXA-Sen)</b>  | Control                          | Donor  | 3.4 (0.8)                            | 0.9 (0.3)                              | 3/3             | 2                                           | 2                                          | 3/3 (160–640)         |
|                             |                                  | DC     | 0.6 (1.1)                            | 0.3 (0.3)                              | 3/3             | 4                                           | 6                                          | 3/3 (160–640)         |
|                             |                                  | AC     | 1 (1.0)                              | 0.3 (0.1)                              | 3/3             | 4 to 6                                      | 6 to 10                                    | 3/3 (160–320)         |
|                             | BXA                              | Donor  | 7.8 (4.1)                            | 1 (0.8)                                | 3/3             | 2                                           | 2                                          | 3/3 (160–640)         |
|                             |                                  | DC     | 0 (0)                                | 0.4 (0.2)                              | 3/3             | 4 to 8                                      | 4 to 6                                     | 3/3 (160–640)         |
|                             |                                  | AC     | 2.6 (4.4)                            | 0.7 (0.5)                              | 3/3             | 8 to 12                                     | 6 to 10                                    | 3/3 (160–320)         |
| <b>BR/08-I38T (BXA-Res)</b> | Control                          | Donor  | 7.9 (2)                              | 0.9 (0.2)                              | 3/3             | 2                                           | 2                                          | 3/3 (160–320)         |
|                             |                                  | DC     | 2.0 (1.5)                            | 0.5 (0.2)                              | 3/3             | 4 to 6                                      | 6 to 8                                     | 3/3 (160–320)         |
|                             |                                  | AC     | 0 (0)                                | 0.5 (0.3)                              | 3/3             | 8 to 12                                     | 10 to 14                                   | 3/3 (320–640)         |
|                             | BXA                              | Donor  | 3.3 (0.6)                            | 1.7 (0.2)                              | 3/3             | 2                                           | 2 to 4                                     | 3/3 (320–640)         |
|                             |                                  | DC     | 0 (0)                                | 0.7 (0.3)                              | 3/3             | 4 to 8                                      | 6 to 10                                    | 3/3 (160–640)         |
|                             |                                  | AC     | 0 (0)                                | 0.9 (0.5)                              | 3/3             | 8 to 12                                     | 8 to 14                                    | 3/3 (80–320)          |

<sup>a</sup>Subcutaneous administration of a single dose of BXA at 8 mg/kg or 0.5% methylcellulose to donor ferrets. Methylcellulose recipients were designated as untreated controls.

<sup>b</sup>Mean, relative to initial body weight at 0 dpi (standard deviation from mean is shown in parenthesis).

<sup>c</sup>Mean, relative to initial body temperature at 0 dpi (standard deviation from mean is shown in parenthesis).

<sup>d</sup>Days post donor inoculation with a positive nasal wash in at least one ferret.

<sup>e</sup>Days post donor inoculation.

<sup>f</sup>Number of ferrets exhibiting serum neutralizing titers of  $\geq 1:40$  reciprocal endpoint dilution to homologous virus/total number of ferrets in the group. HI titers are indicated in parentheses.

**Supplemental Table S2.** Virus pathogenicity, transmission, and seroconversion in ferrets co-inoculated with mixtures of BXA-Sen and BXA-Res IBVs

| Experimental group                          | Antiviral treatment <sup>a</sup> | Status | Maximum weight Loss (%) <sup>b</sup> | Body temp. elevation (°C) <sup>c</sup> | Virus detection | Day of onset of virus shedding <sup>d</sup> | Day of highest virus shedding <sup>e</sup> | Serology <sup>f</sup> |
|---------------------------------------------|----------------------------------|--------|--------------------------------------|----------------------------------------|-----------------|---------------------------------------------|--------------------------------------------|-----------------------|
| <b>BR/08-I38:I38T<br/>(BXA-Sen:BXA-Res)</b> | Control                          | Donor  | 0 (0)                                | 1.8 (0.3)                              | 3/3             | 2 (3/3)                                     | 2                                          | 3/3 (80–160)          |
|                                             |                                  | DC     | 0.7 (0.6)                            | 0.6 (0.4)                              | 3/3             | 4 (3/3)                                     | 4 to 6                                     | 3/3 (80–160)          |
|                                             |                                  | AC     | 0 (0)                                | 0.3 (0.3)                              | 3/3             | 4 (3/3)                                     | 5                                          | 3/3 (80–160)          |
|                                             | BXA                              | Donor  | 2.3 (3)                              | 0.7 (0.3)                              | 3/3             | 2 (3/3)                                     | 2                                          | 3/3 (160)             |
|                                             |                                  | DC     | 1.0 (0.6)                            | 0.7 (0.5)                              | 3/3             | 4 (2/3)                                     | 4 to 6                                     | 3/3 (80–160)          |
|                                             |                                  | AC     | 0.3 (0.6)                            | 0.5 (0.1)                              | 0/3             | 0 (0/3)                                     | — <sup>g</sup>                             | 0/3 (<20)             |
| <b>PH/13-I38:I38T<br/>(BXA-Sen:BXA-Res)</b> | Control                          | Donor  | 0 (0)                                | 0.9 (0.7)                              | 3/3             | 2 (3/3)                                     | 2 to 4                                     | 3/3 (80–160)          |
|                                             |                                  | DC     | 0 (0)                                | 0.5 (0.2)                              | 3/3             | 4 (3/3)                                     | 4 to 6                                     | 3/3 (80–160)          |
|                                             |                                  | AC     | 0 (0)                                | 0.4 (0.1)                              | 3/3             | 6 (3/3)                                     | 6 to 10                                    | 3/3 (160)             |
|                                             | BXA                              | Donor  | 0 (0)                                | 1.2 (0.6)                              | 3/3             | 2 (3/3)                                     | 2                                          | 3/3 (80)              |
|                                             |                                  | DC     | 0 (0)                                | 0.5 (0.2)                              | 3/3             | 4 (2/3)                                     | 6 to 12                                    | 3/3 (80–160)          |
|                                             |                                  | AC     | 0 (0)                                | 0.7 (1.1)                              | 3/3             | 8 (1/3)                                     | 10 to 16                                   | 3/3 (80–320)          |

<sup>a</sup>Subcutaneous administration of a single dose of BXA at 8 mg/kg or 0.5% methylcellulose to donor ferrets. Methylcellulose recipients were designated as untreated controls.

<sup>b</sup>Mean, relative to initial body weight at 0 dpi (standard deviation from mean is shown in parenthesis).

<sup>c</sup>Mean, relative to initial body temperature at 0 dpi (standard deviation from mean is shown in parenthesis).

<sup>d</sup>Days post donor inoculation with a positive nasal wash in at least one ferret (number of ferrets that met the criterion/total number of ferrets in the group).

<sup>e</sup>Days post donor inoculation.

<sup>f</sup>Number of ferrets exhibiting serum neutralizing titers of  $\geq 1:40$  reciprocal endpoint dilution to homologous virus/total number of ferrets in the group. HI titers are indicated in parentheses.

<sup>g</sup>No virus detected.
